# Supplementary material for: Noise Reduction by Diffusional Dissipation in a Minimal Quorum Sensing Motif
Source: PubMed Central journal article supplement (PMC2507755; doi:10.1371/journal.pcbi.1000167), 2008-08-29

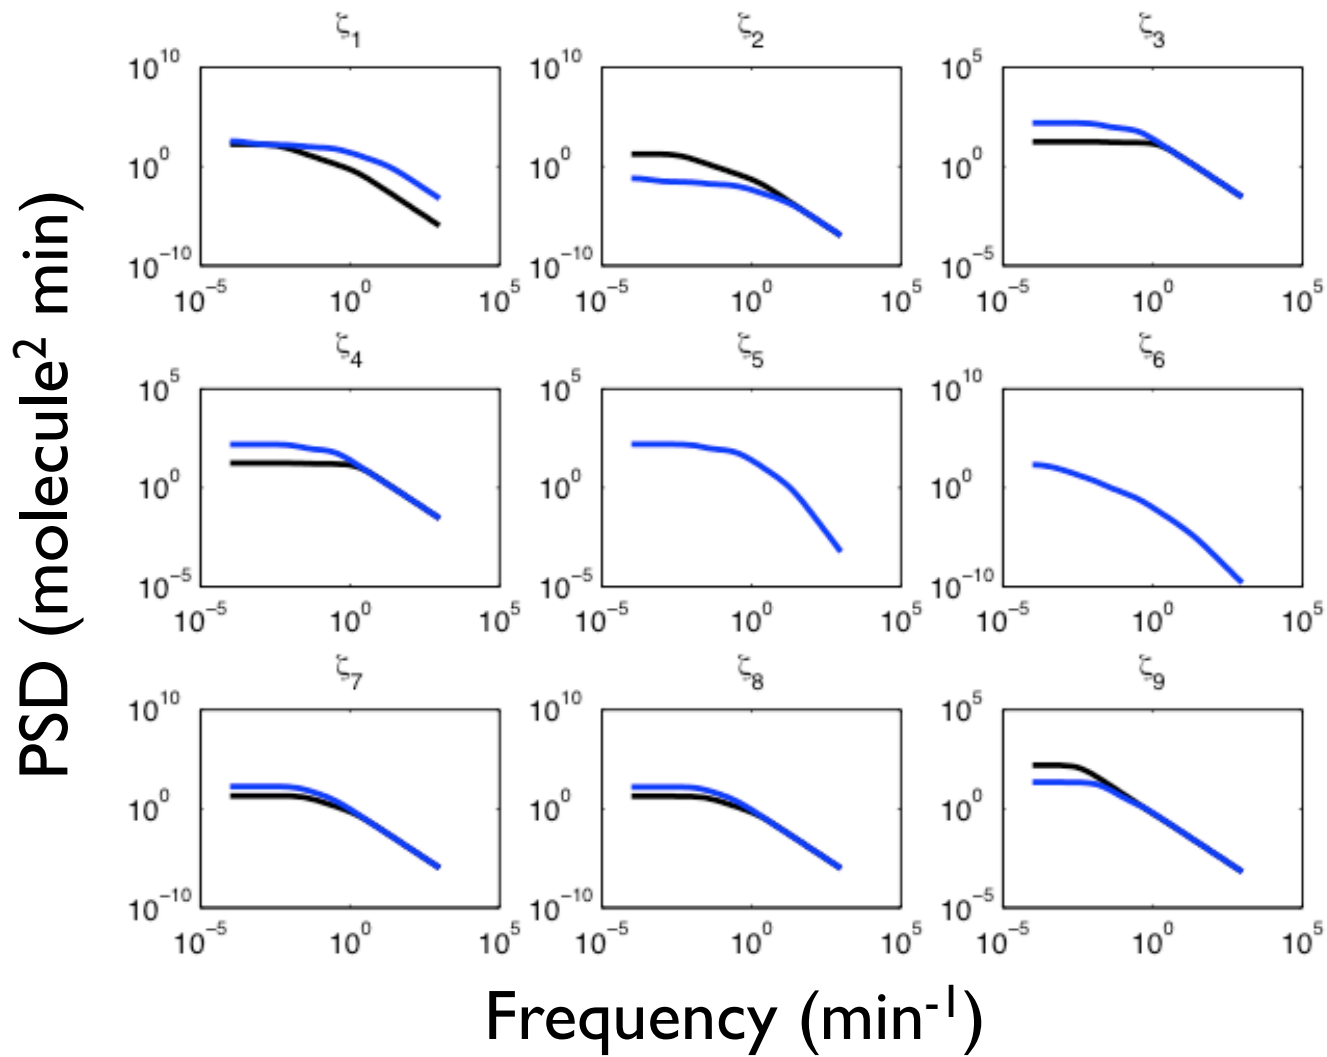

Supplement: pcbi.1000167.s004.pdf [file pcbi.1000167.s004.pdf]
