# Supplementary material for: Noise Reduction by Diffusional Dissipation in a Minimal Quorum Sensing Motif
Source: PLOS journal article supplement (doi:10.1371/journal.pcbi.1000167), 2008-08-29
Supplement: S11 (10.1371/journal.pcbi.1000167.s011) [file journal.pcbi.1000167.s011]

301 Moved Permanently

# Moved Permanently

The document has moved here.

---

Apache Server at www.ploscompbiol.org Port 80
